# Supplementary material for: Inhibitory Effect of 1,5-Dimethyl Citrate from Sea Buckthorn (Hippophae rhamnoides) on Lipopolysaccharide-Induced Inflammatory Response in RAW 264.7 Mouse Macrophages
Source: Foods. 2020 Mar 2;9(3):269. doi: 10.3390/foods9030269 (PMC7143571; doi:10.3390/foods9030269)
Supplement: Supplementary file 1 [file foods-09-00269-s001.pdf]

## Supplementary Materials

---

**Figure S1.** ECD data of compounds **5** (A) and **6** (B).

(A)

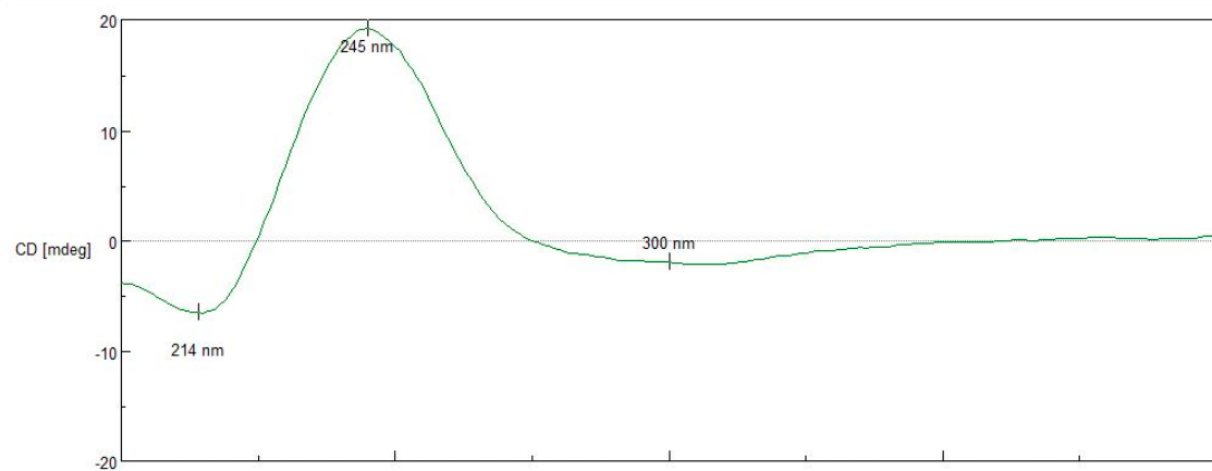

(B)

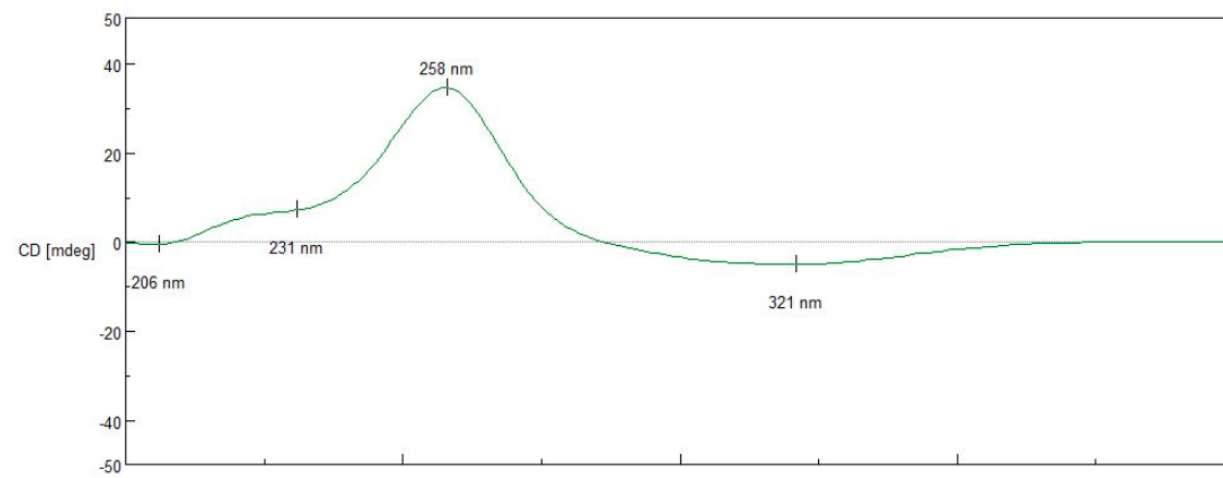

**Figure S2.** LC/MS-based analysis (detection wavelength was set as 210 nm) of the ethyl acetate-soluble fraction as well as the chemical structures of compounds **1–4**.

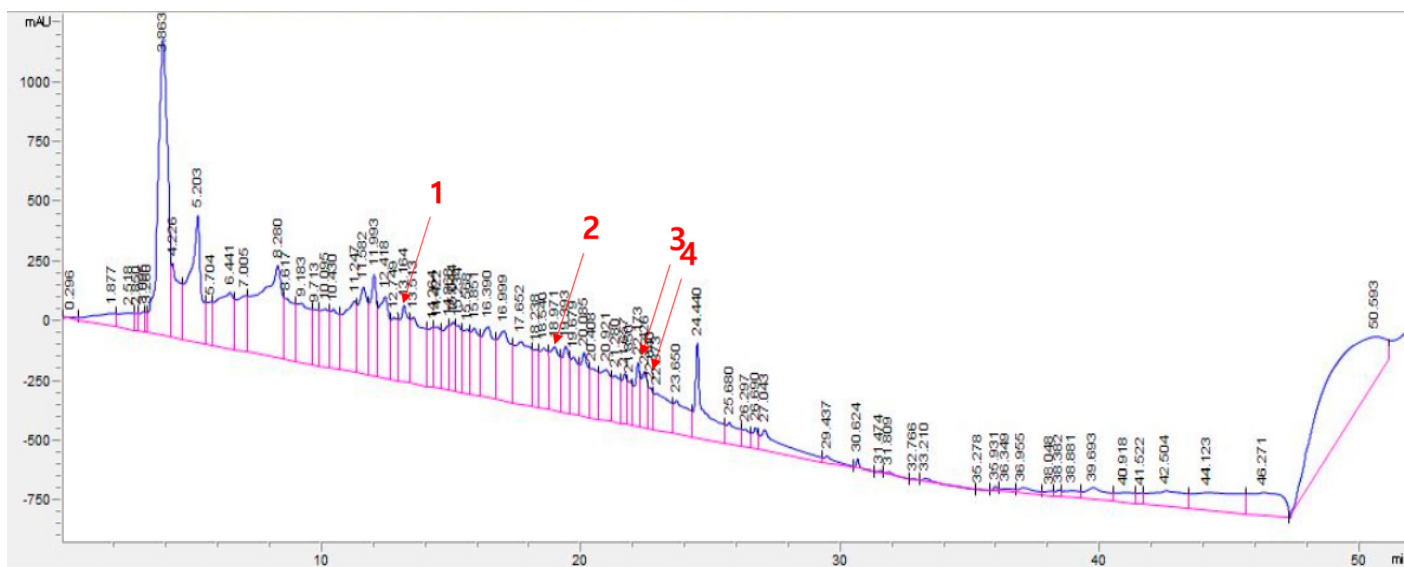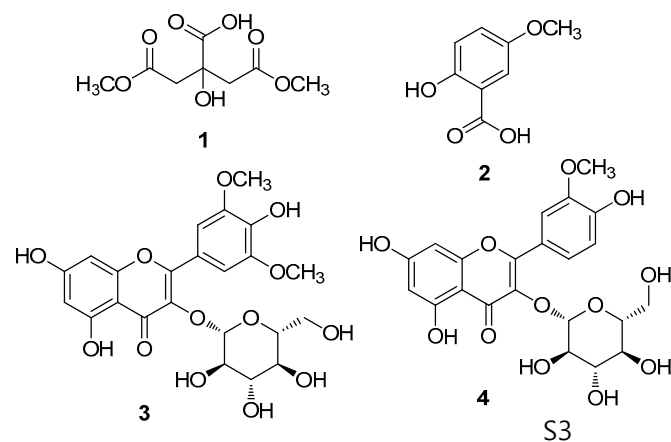

Analysis condition

- Agilent Technologies 1200s
- Column: Agilent Eclipse Plus C18 3.5  $\mu$ m 100 x 4.6 mm
- Flow: 0.3 mL/min
- Detector: PDA detector (210 nm)
- Mobile phase: Water-MeOH gradient

| Time | MeOH |
|------|------|
| 0.0  | 10   |
| 30   | 100  |
| 40   | 100  |
| 50   | 10   |

**Figure S3.** LC/MS-based analysis (detection wavelength was set as 210 nm) of the CH<sub>2</sub>Cl<sub>2</sub>-soluble fraction as well as the chemical structures of compounds **5–6**.

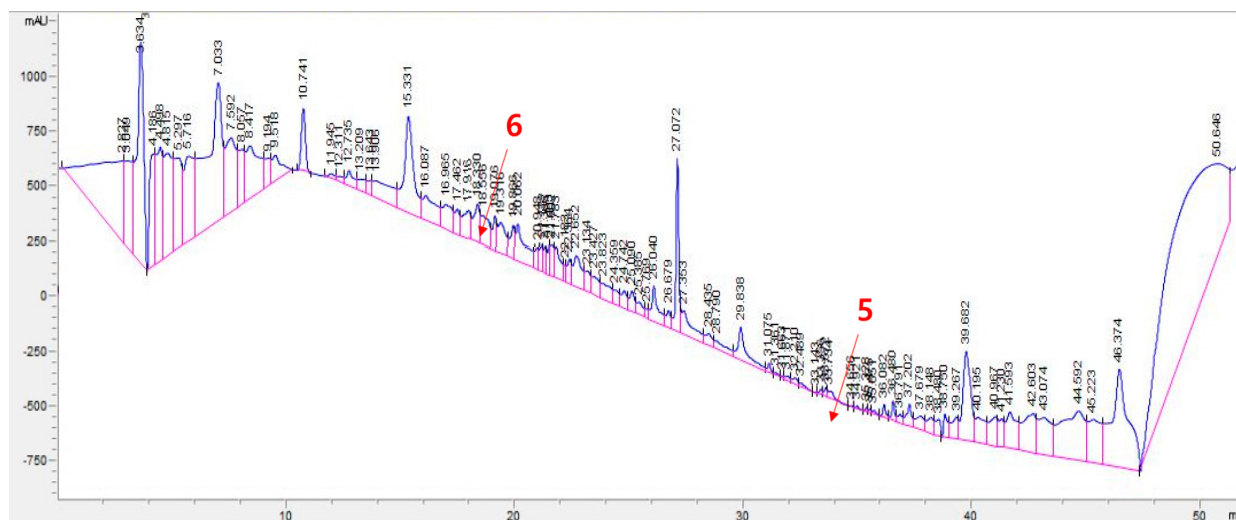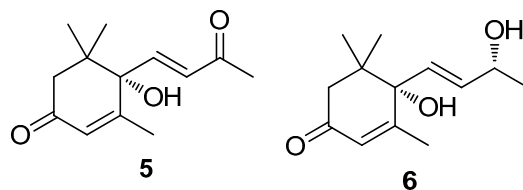

**Analysis condition**

- Agilent Technologies 1200s
- Column: Agilent Eclipse Plus C18 3.5  $\mu$ m 100 x 4.6 mm
- Flow: 0.3 mL/min
- Detector: PDA detector (210 nm)
- Mobile phase: Water-MeOH gradient

| Time | MeOH |
|------|------|
| 0.0  | 10   |
| 30   | 100  |
| 40   | 100  |
| 50   | 10   |

**Figure S4.** LC/MS analysis for purity of compounds **1–6**.

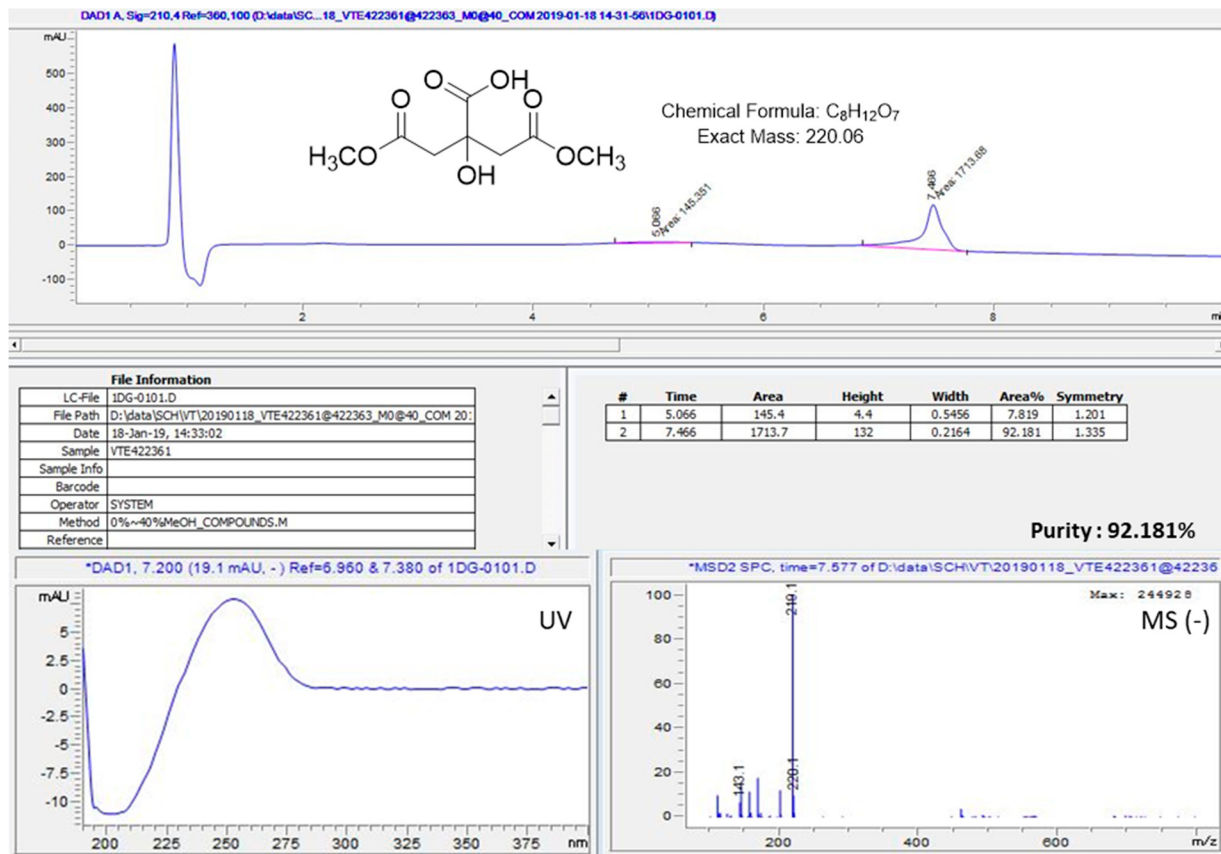

Analysis condition

- Agilent Technologies 1200s
- Column: Phenomenex Kinetex 5  $\mu$ m C18 100A 100 x 2.1 mm
- Flow: 0.3 mL/min
- Detector: PDA detector (210 nm)
- Mobile phase: Water-MeOH gradient

| Time | MeOH |
|------|------|
| 0.0  | 0    |
| 10   | 40   |

**Compound 1**

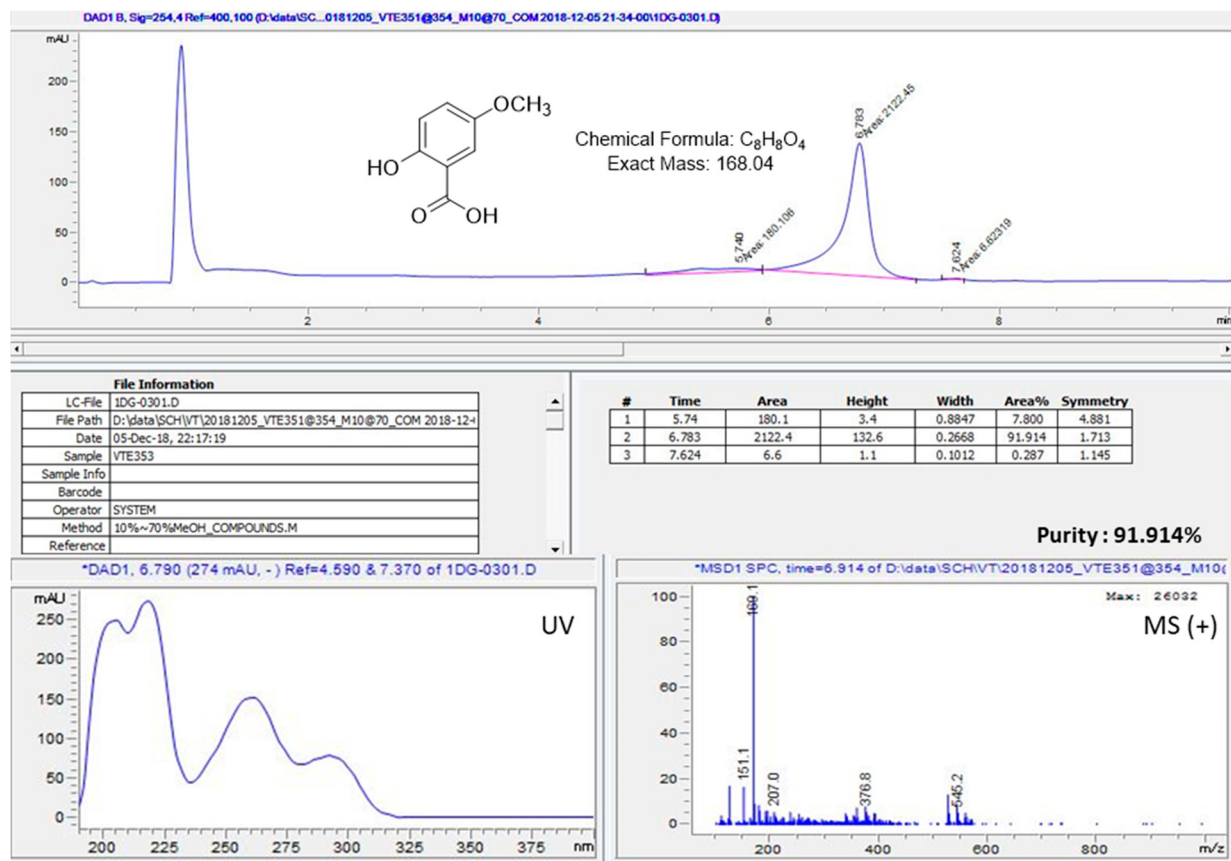

Analysis condition

- Agilent Technologies 1200s
- Column: Phenomenex Kinetex 5  $\mu$ m C18 100A 100 x 2.1 mm
- Flow: 0.3 mL/min
- Detector: PDA detector (254 nm)
- Mobile phase: Water-MeOH gradient

| Time | MeOH |
|------|------|
| 0.0  | 10   |
| 10   | 70   |

**Compound 2**

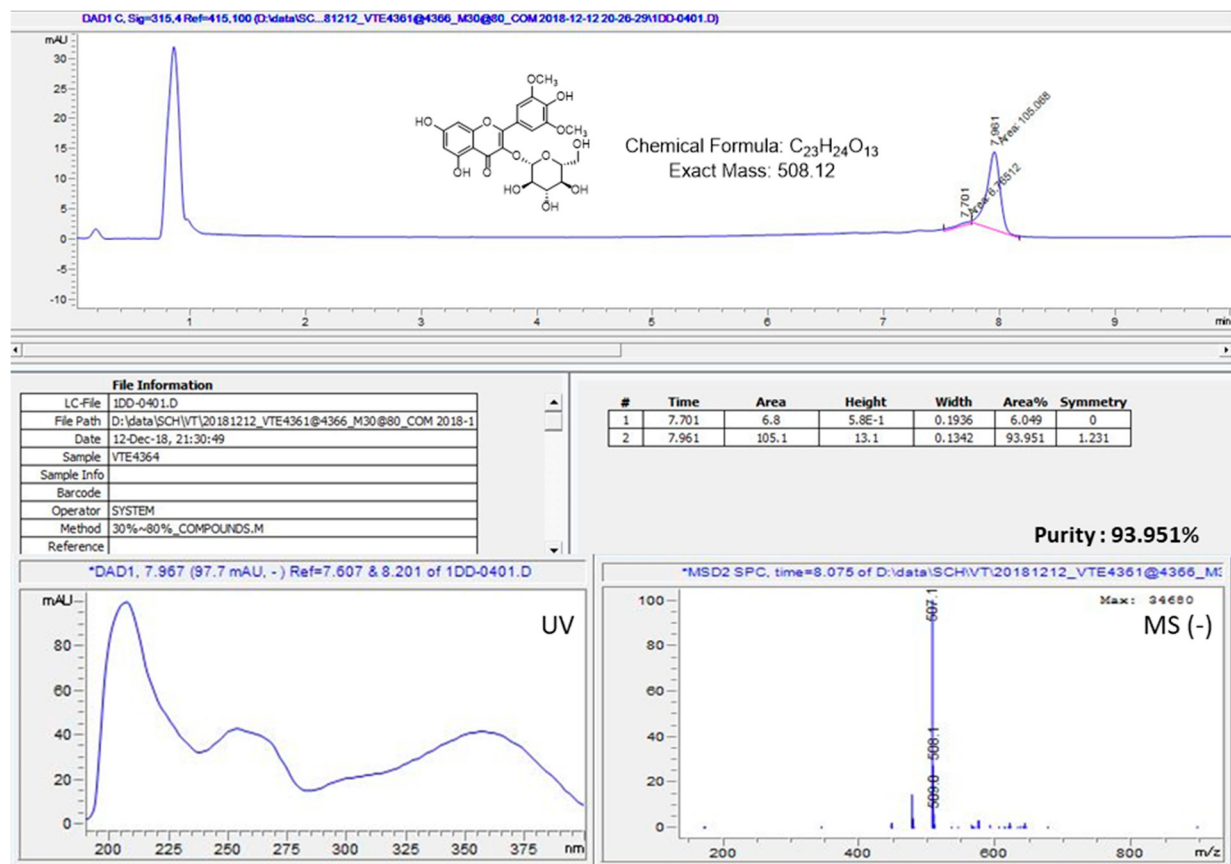

#### Analysis condition

- Agilent Technologies 1200s
- Column: Phenomenex Kinetex 5  $\mu$ m C18 100A 100 x 2.1 mm
- Flow: 0.3 mL/min
- Detector: PDA detector (315 nm)
- Mobile phase: Water-MeOH gradient

| Time | MeOH |
|------|------|
| 0.0  | 30   |
| 10   | 80   |

### Compound 3

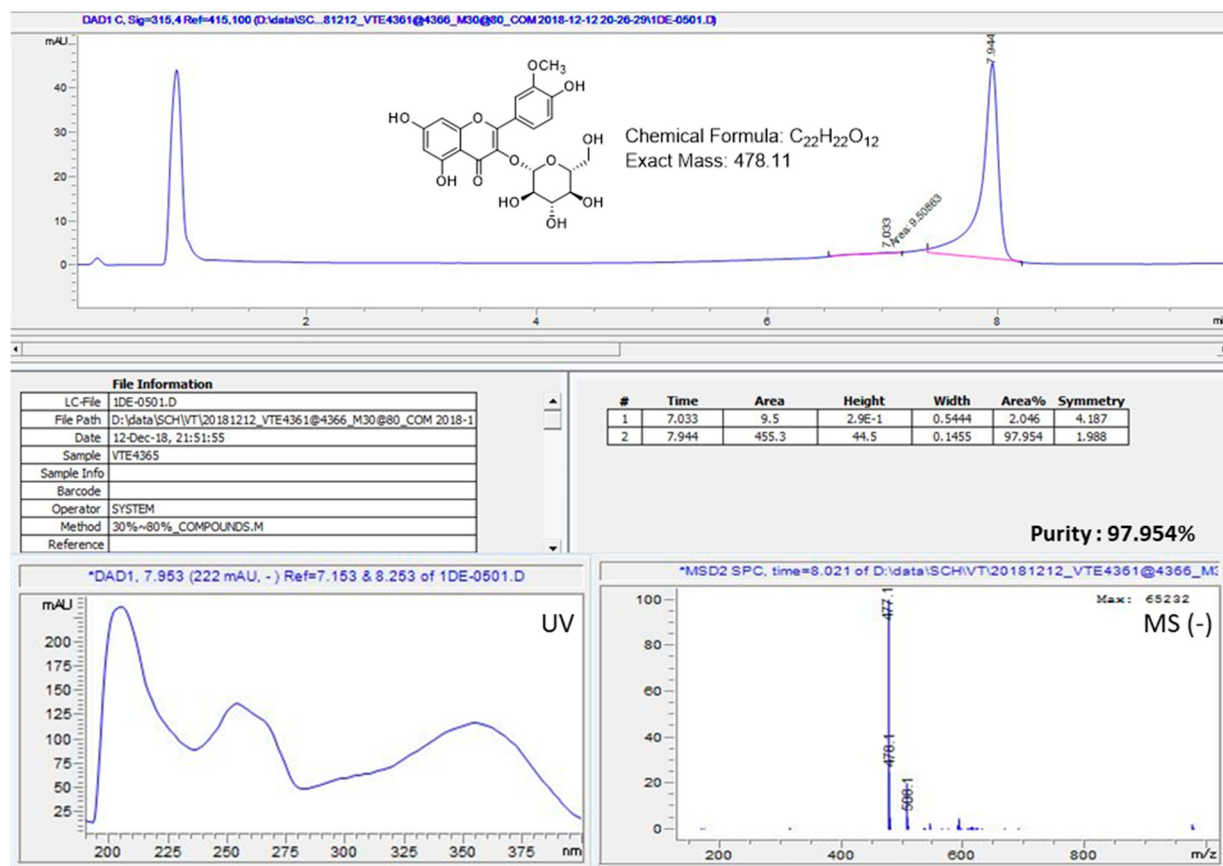

Analysis condition

- Agilent Technologies 1200s
- Column: Phenomenex Kinetex 5  $\mu$ m C18 100A 100 x 2.1 mm
- Flow: 0.3 mL/min
- Detector: PDA detector (315 nm)
- Mobile phase: Water-MeOH gradient

| Time | MeOH |
|------|------|
| 0.0  | 30   |
| 10   | 80   |

## Compound 4

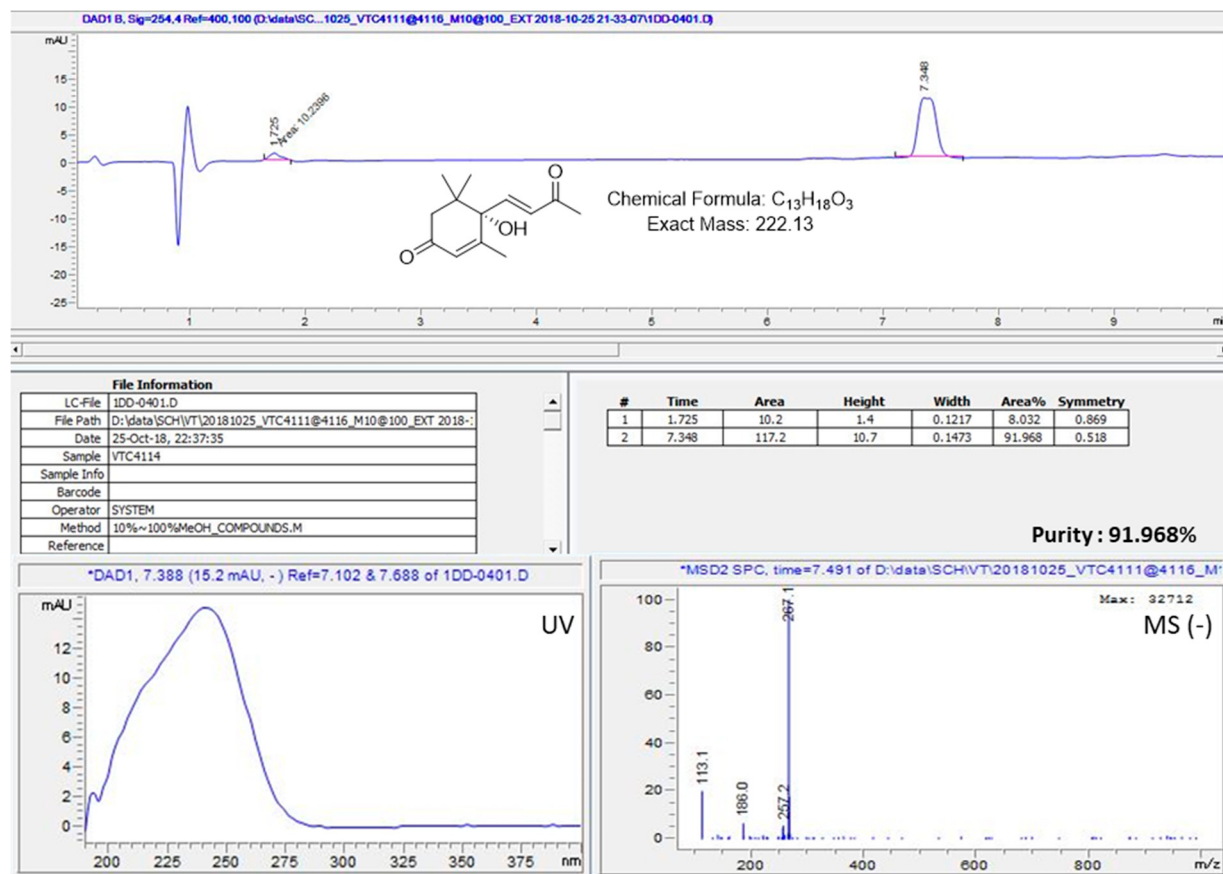

#### Analysis condition

- Agilent Technologies 1200s
- Column: Phenomenex Kinetex 5  $\mu$ m C18 100A 100 x 2.1 mm
- Flow: 0.3 mL/min
- Detector: PDA detector (254 nm)
- Mobile phase: Water-MeOH gradient

| Time | MeOH |
|------|------|
| 0.0  | 10   |
| 10   | 100  |

## Compound 5

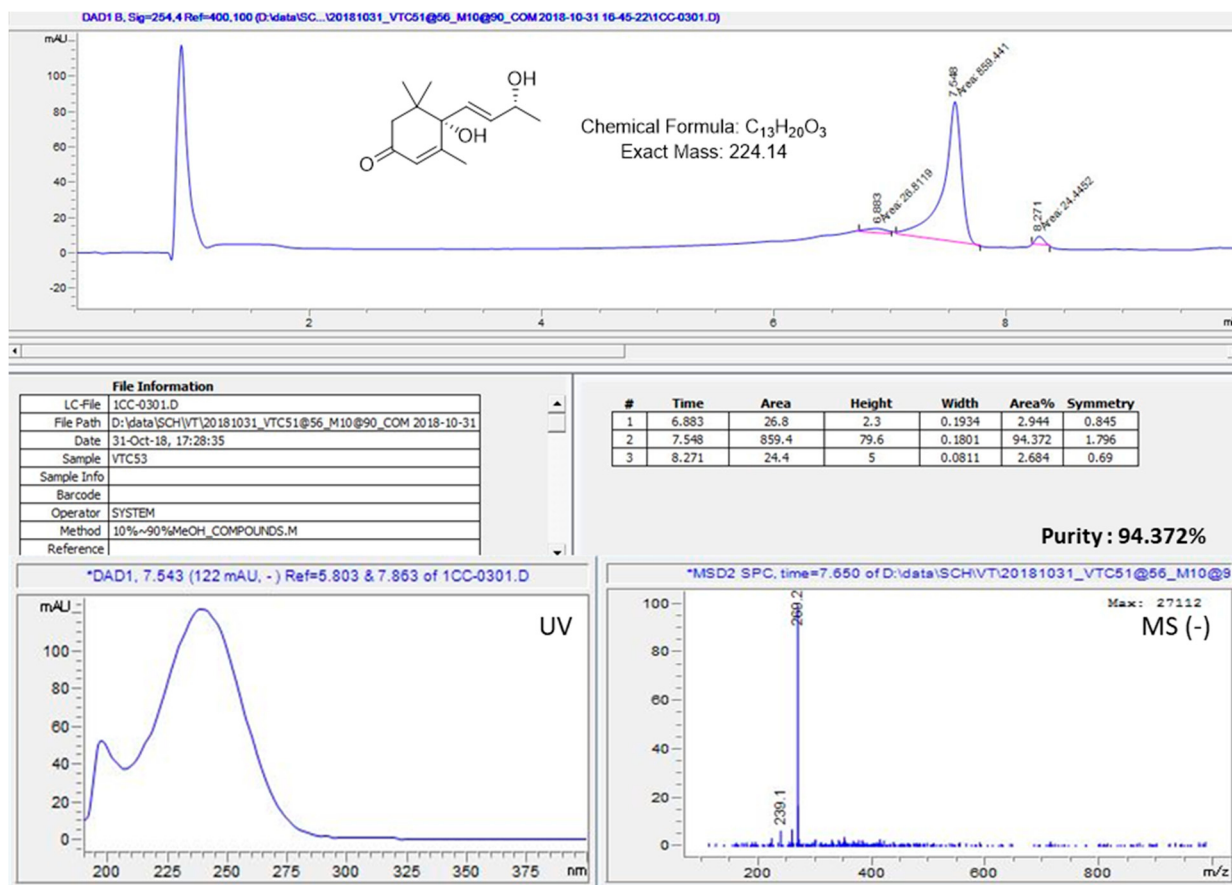

Analysis condition

- Agilent Technologies 1200s
- Column: Phenomenex Kinetex 5  $\mu$ m C18 100A 100 x 2.1 mm
- Flow: 0.3 mL/min
- Detector: PDA detector (254 nm)
- Mobile phase: Water-MeOH gradient

| Time | MeOH |
|------|------|
| 0.0  | 10   |
| 10   | 90   |

## Compound 6
